# Supplementary material for: Comparative genomic and functional analyses: unearthing the diversity and specificity of nematicidal factors in Pseudomonas putida strain 1A00316
Source: PubMed Central journal article supplement (PMC4935845; doi:10.1038/srep29211), 2016-07-07

Supplementary information for

**Comparative genomic and functional analyses: unearthing the  
diversity and specificity of nematicidal factors in *Pseudomonas putida*  
strain 1A00316**

Jing Guo<sup>1,2§</sup>, Xueping Jing<sup>1§</sup>, Wen-Lei Peng<sup>2§</sup>, Qiyu Nie<sup>1§</sup>, Yile Zhai<sup>1</sup>, Zongze Shao<sup>3</sup>, Longyu  
Zheng<sup>1</sup>, Minmin Cai<sup>1</sup>, Guangyu Li<sup>3</sup>, Huaiyu Zuo<sup>1</sup>, Zhitao Zhang<sup>1</sup>, Rui-Ru Wang<sup>2</sup>, Dian Huang<sup>1</sup>,  
Wanli Cheng<sup>1</sup>, Ziniu Yu<sup>1</sup>, Ling-Ling Chen<sup>2\*</sup>, Jibin Zhang<sup>1\*</sup>

<sup>1</sup>State Key Laboratory of Agricultural Microbiology and National Engineering Research  
Center of Microbe Pesticides, College of Life Science and Technology, Huazhong  
Agricultural University, Wuhan 430070, Hubei, China

<sup>2</sup>Agricultural Bioinformatics Key Laboratory of Hubei Province, College of Informatics,  
Huazhong Agricultural University, Wuhan 430070, Hubei, China

<sup>3</sup>Key Laboratory of Marine Biogenetic Resources, Third Institute of Oceanography, State  
Oceanic Administration, Xiamen 361005, Fujian, China

**\*Correspondence:**

Jibin Zhang, State Key Laboratory of Agricultural Microbiology, College of Life Science and  
Technology, Huazhong Agricultural University, Wuhan 430070, Hubei, China.

E-mail: zhangjb@mail.hzau.edu.cn

Fax: 86-27-87287254; Tel: 86-27-87287701

Ling-Ling Chen, Agricultural Bioinformatics Key Laboratory of Hubei Province, College of  
Informatics, Huazhong Agricultural University, Wuhan 430070, Hubei, China

E-mail: llchen@mail.hzau.edu.cn

Tel (Fax): 86-27-87280877

**§ Equal contributors**

**Figure S1.** Maximum likelihood phylogeny inferred from 2,408 single-copy conserved protein-coding genes in the *P. putida* 1A00316 genome.

**Figure S2.** Sequence alignment of the AprA protein in various *Pseudomonas* strains. Green sequence fragments are the ZnMc\_serralysin\_like domain, and red amino acids are active sites.

**Figure S1**

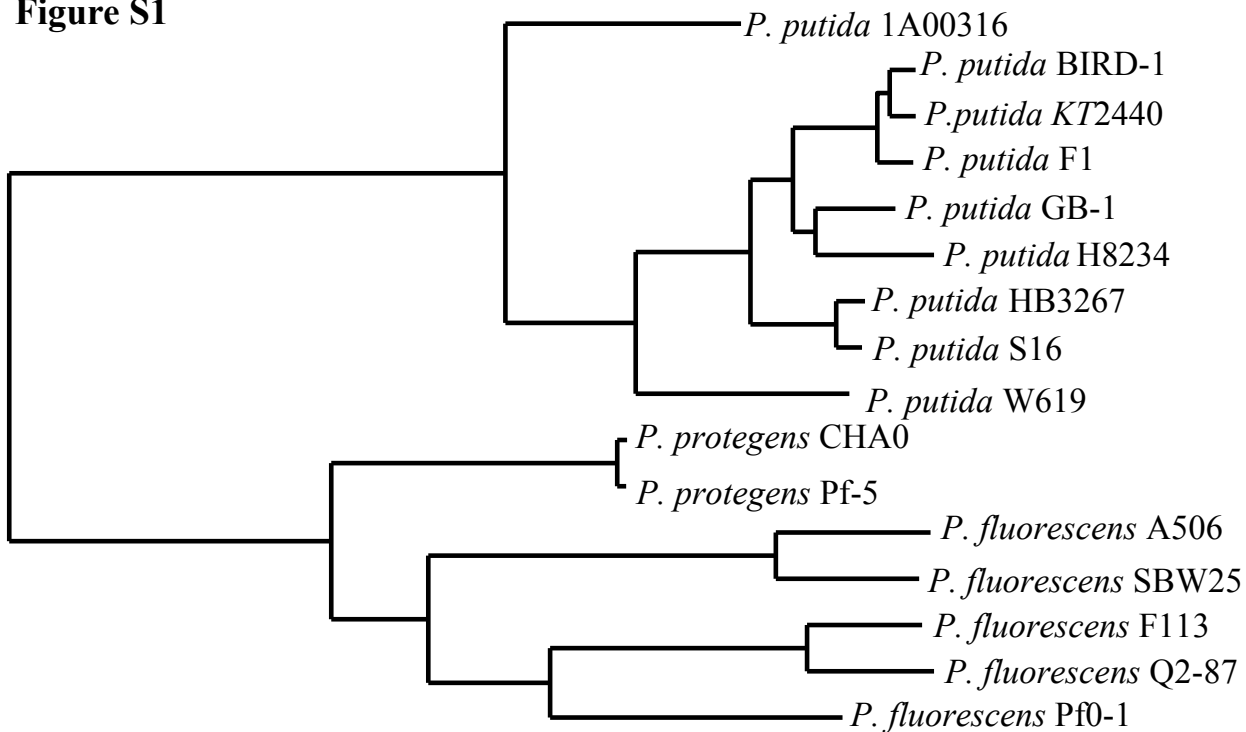

**0.05**

# Figure S2

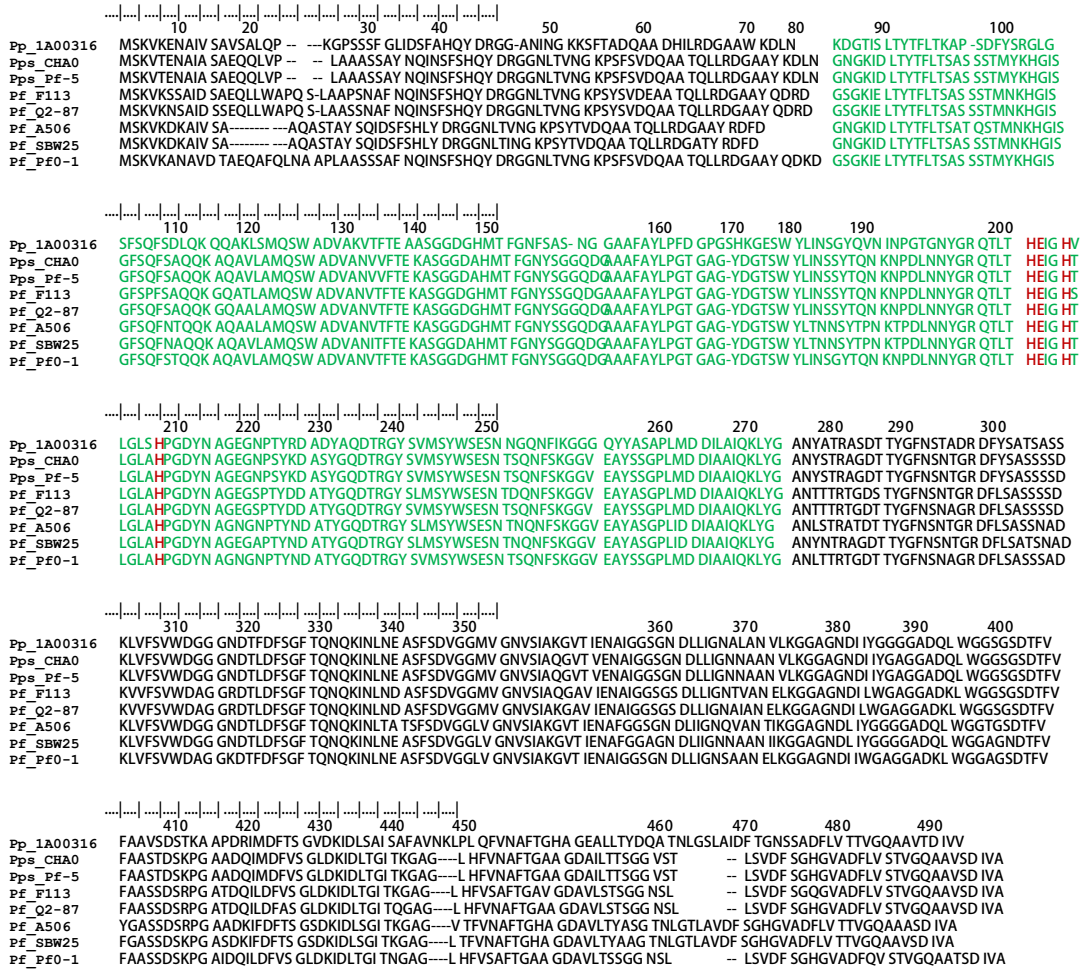

Supplement: srep29211-s1.pdf [file srep29211-s1.pdf]
